# Supplementary material for: MiR-218 affects hypertrophic differentiation of human mesenchymal stromal cells during chondrogenesis via targeting RUNX2, MEF2C, and COL10A1
Source: PubMed Central journal article supplement (PMC7727242; doi:10.1186/s13287-020-02026-6), 2020-12-10
Supplement: 13287_2020_2026_MOESM1_ESM.pdf [file 13287_2020_2026_MOESM1_ESM.pdf]

Electronic supplementary material for:

**MiR-218 affects hypertrophic differentiation of human mesenchymal stromal cells during chondrogenesis *via* targeting *RUNX2*, *MEF2C*, and *COL10A1***

Svitlana Melnik, Jessica Gabler, Simon Dreher, Nicole Hecht, Nina Hofmann, Tobias Großner, Wiltrud Richter

To whom correspondence should be addressed:

E-mail: wiltrud.richter@med.uni-heidelberg.de

This pdf file includes:

Supplementary Tables S1 – S2

Supplementary Fig. S1 – S3

**Supplementary Table S1** List of qRT-PCR primers used in this study

| <b>Gene Name</b> | <b>Sequence</b>                                      |
|------------------|------------------------------------------------------|
| <i>ACTB</i>      | CTCTTCCAGCCTTCCTTCCT<br>CGATCCACACGGAGTACTTG         |
| <i>ALPL</i>      | CACCAACGTGGCTAAGAATG<br>ATCTCCAGCCTGGTCTCCTC         |
| <i>AXIN2</i>     | TAGCTGAGGTGTCGAAGCC<br>CCTTCAGCATCCTCCGGTAT          |
| <i>COL10A1</i>   | TTGCTCTCCTCTTACTGCTAT<br>TTACGCTGAACGATACCAA         |
| <i>COL2A1</i>    | TGGCCTGAGACAGCATGAC<br>AGTGTTGGGAGCCAGATTGT          |
| <i>HPRT</i>      | AAGGGTGTTTATTCCTCATGGA<br>CCTCCATCTCCTTCATCAC        |
| <i>CPSF6</i>     | AAGATTGCCTTCATGGAATTGAG<br>TCGTGATCTACTATGGTCCCTCTCT |
| <i>MEF2C</i>     | GTATGGCAATCCCCGAAACT<br>ATCGTATTCTTGCTGCCTGG         |
| <i>RUNX2</i>     | ACTCTACCACCCCGCTGTC<br>CAGAGGTGGCAGTGTCATCA          |
| <i>RLP13</i>     | CATTTCTGGCAATTTCTACAG<br>CAGGCAACGCATGAGGAAT         |
| <i>ROBO1</i>     | AGTGACGCTGGCAAATATGT<br>CTGCCAAGTTACTGGGTCTC         |

**Supplementary Table S2** List of cloning primers used in this study

| <b>Gene Name</b> | <b>Sequence</b>                                                           |
|------------------|---------------------------------------------------------------------------|
| <i>MEF2C</i>     | AAACTAGTCCCATCCTTACAACCCATCCT<br>CGCAAGCTTTGTTACTCTAGGACGGGTTATGT         |
| <i>COL10A1</i>   | AAACTAGTGCTGAGCCTTGTGCCTCCCATTCAAGT<br>GCGCGCAAGCTTAGCCTTGAAAGAATGGTTGAGA |

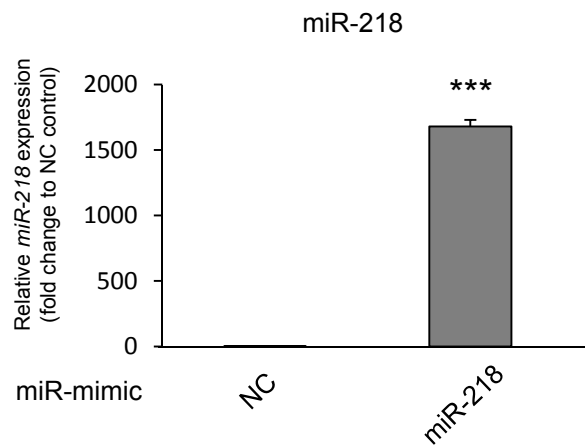

**Fig. S1** miR-218 transfection efficiency in SaOS-2 cells. SaOS-2 cells were transiently transfected with miR-218 (grey), or with non-targeting control (NC, black) mimic, and transfection efficiency was controlled by qRT-PCR. Mean values  $\pm$  SD are shown,  $n = 2$ ; \*\*\* $p \leq 0.001$ , two-tailed  $t$ -test.

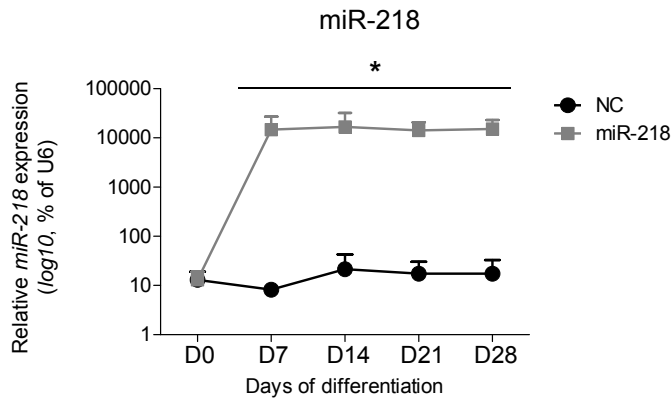

**Fig. S2** miR-218 transfection efficiency in human MSC. MSC cells (N = 3 donors) were transiently transfected with miR-218 (grey), or with non-targeting control (NC, black) mimic before cells were subjected to chondrogenic differentiation for 28 days, and transfection efficiency was controlled by qRT-PCR at indicated time points. Mean values  $\pm$  SD are shown; \* $p \leq 0.05$ , NC vs miR-218; expression kinetic curves were compared using two-tailed paired  $t$ -test.

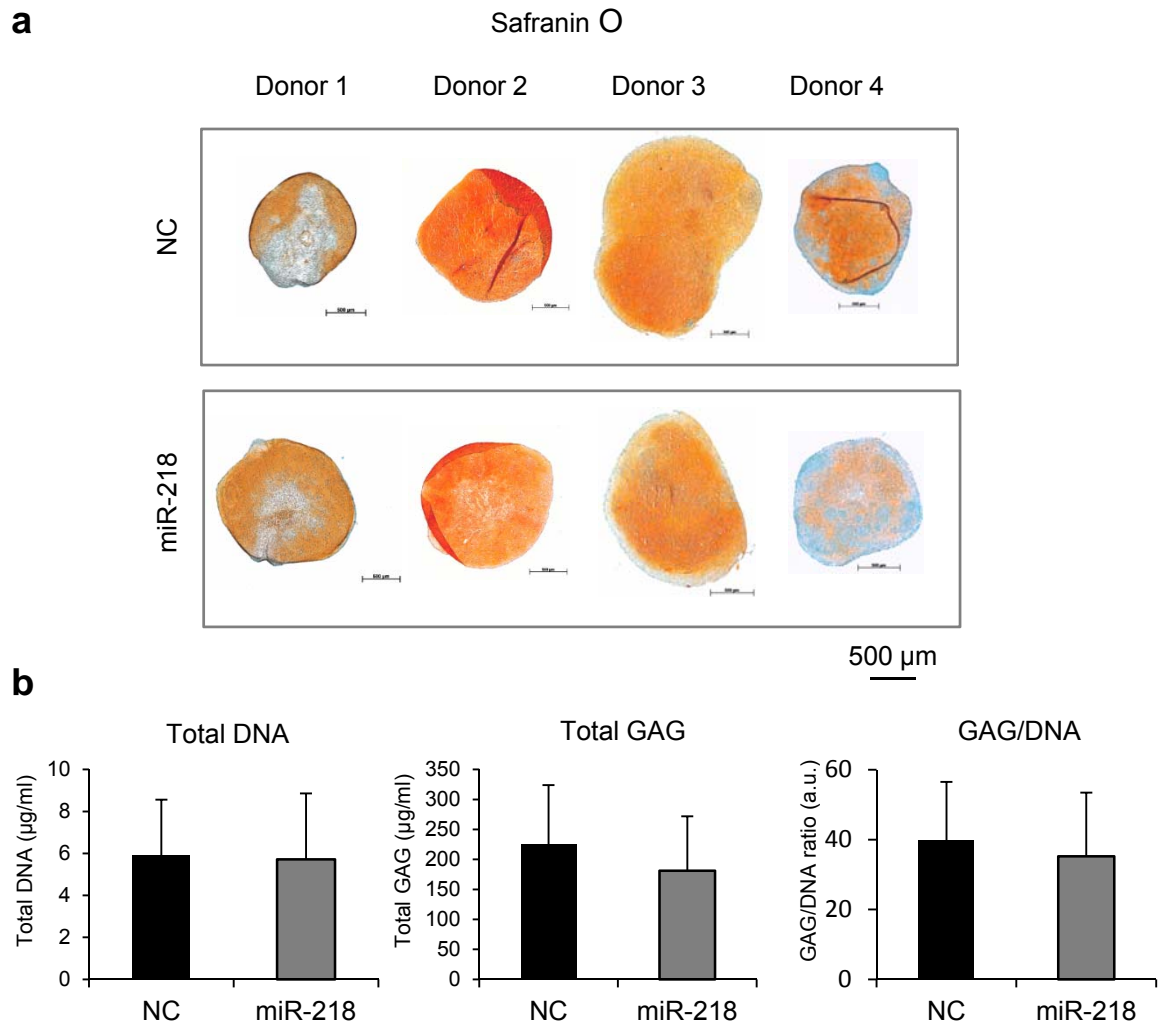

**Fig. S3** Gain of function of miR-218 at the start of chondrogenic differentiation does not additionally boost MSC chondrogenesis. MSC (N = 4 - 6) were transfected with miR-218 (grey), or with a control non-targeting miR (NC, black) mimics at day 0, and subjected to chondrogenic differentiation for 28 days. **a**, Safranin O staining of 3D pellet cultures at day 28 chondrogenesis. Scale bar, 500  $\mu$ m. **b**, Total GAG and DNA content of 3D pellet cultures was assessed by DMMB and PicoGreen assays at day 28 of chondrogenesis; Mean values  $\pm$  SD are shown; N = 6 donors.
